# Supplementary material for: Performance and Scalability of Discriminative Metrics for Comparative Gene Identification in 12 Drosophila Genomes
Source: PubMed Central journal article supplement (PMC2291194; doi:10.1371/journal.pcbi.1000067), 2008-04-18

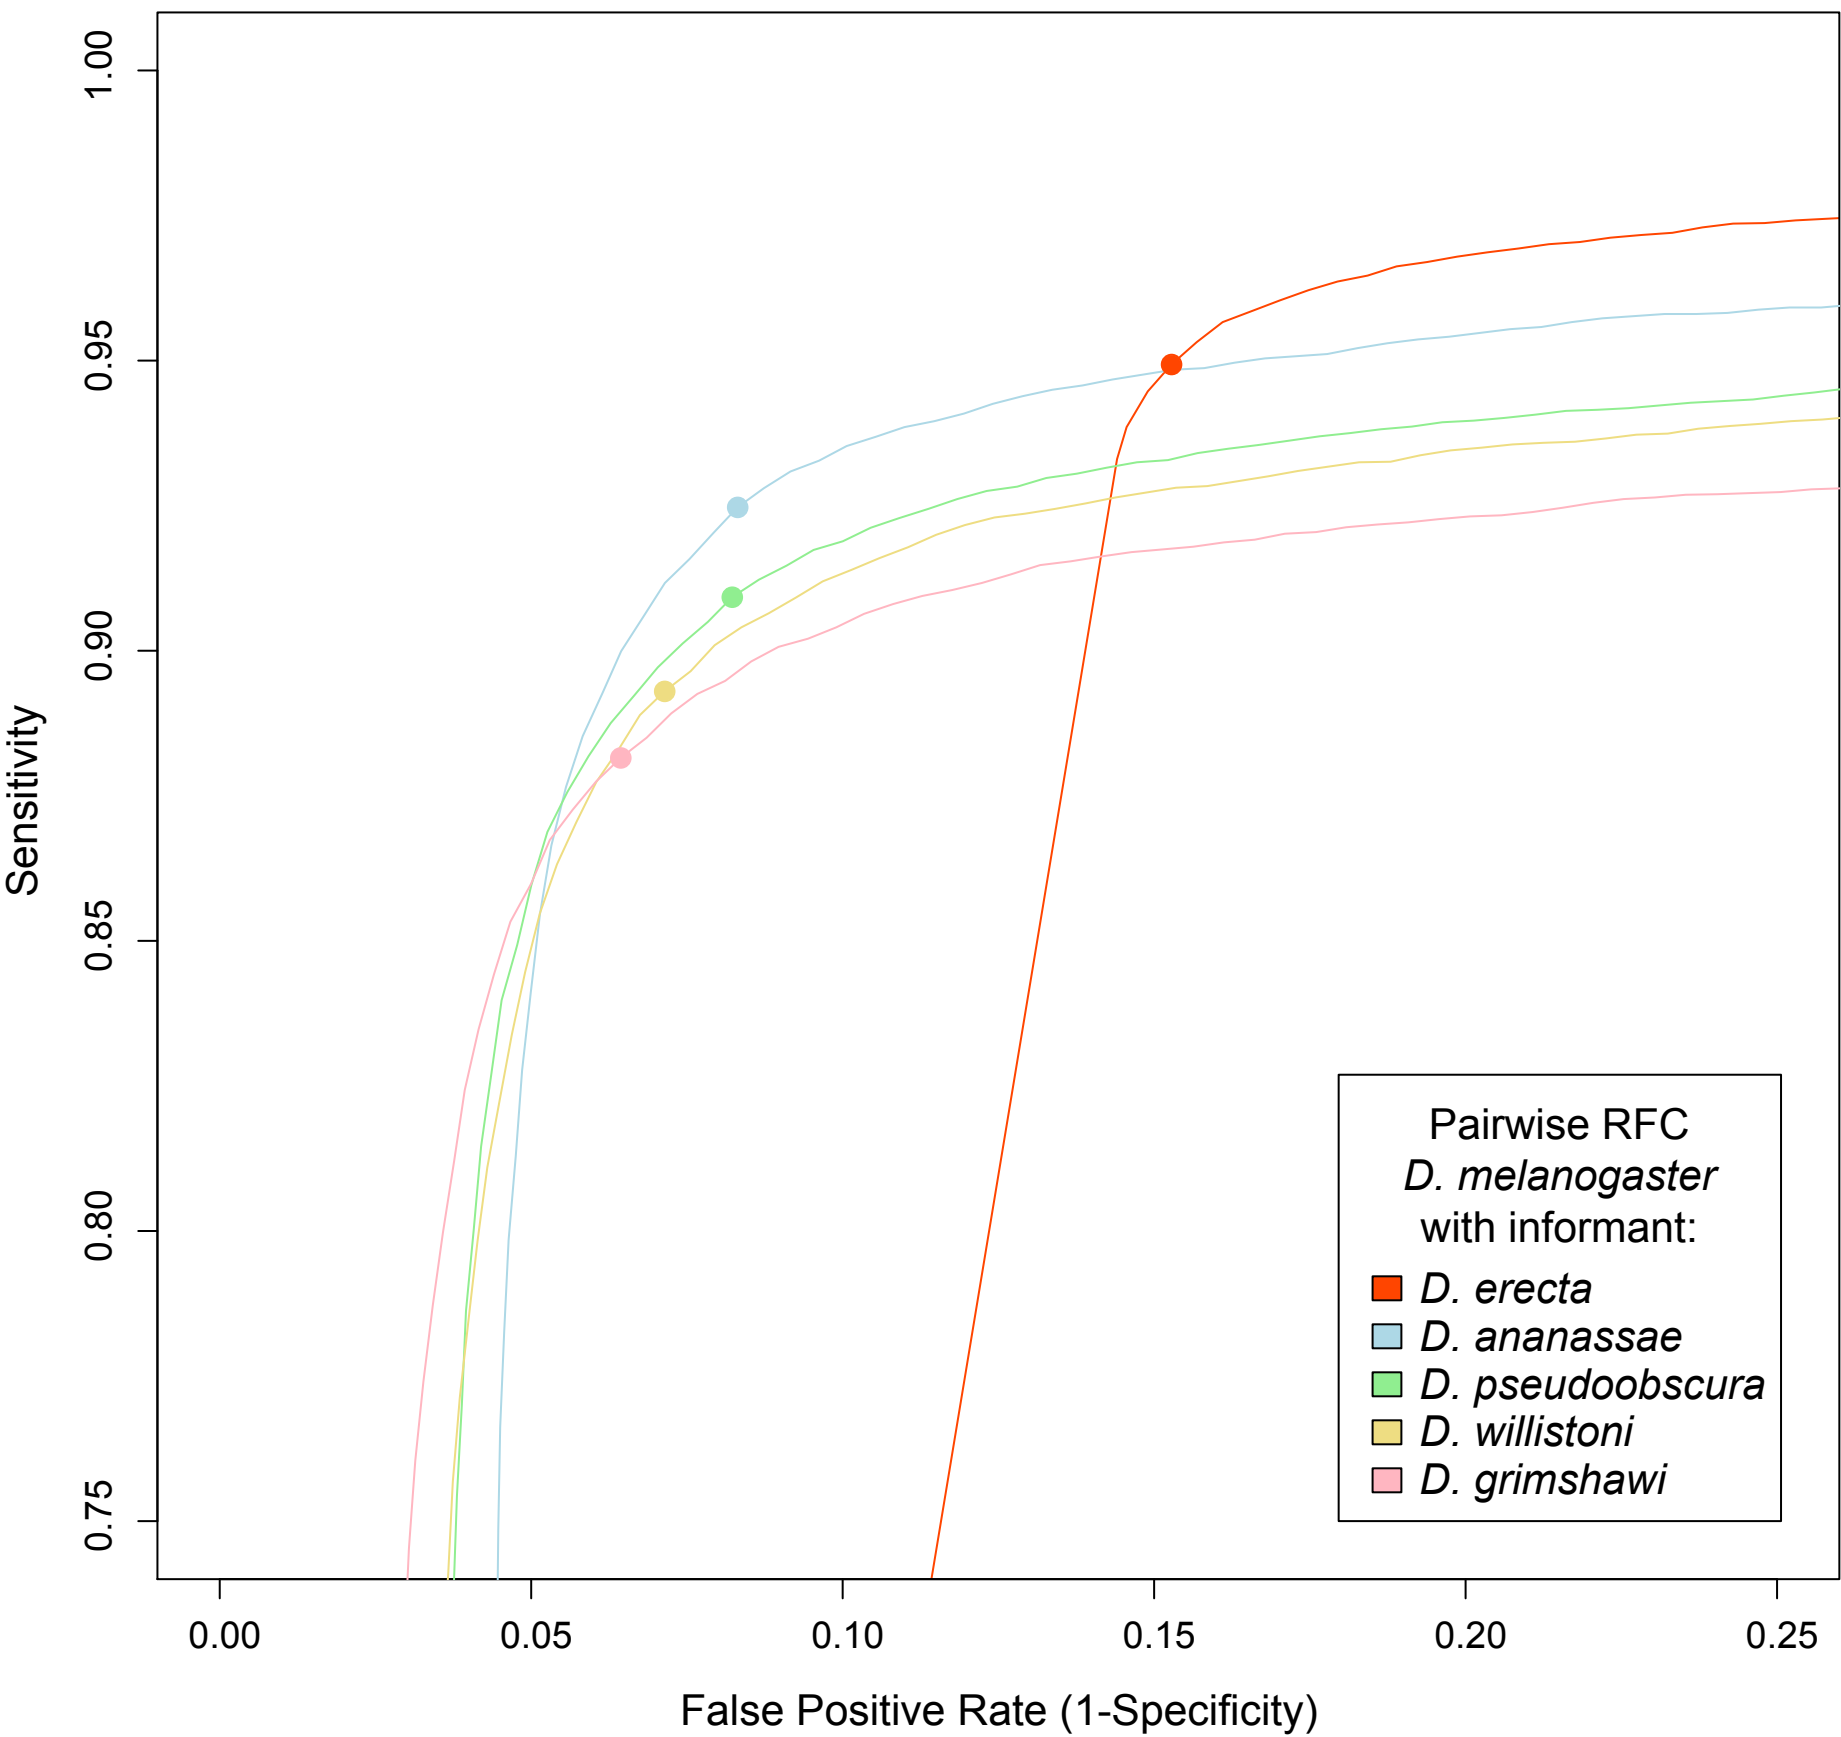

Supplement: pcbi.1000067.s004.pdf [file pcbi.1000067.s004.pdf]
